# Supplementary material for: High Performance of Ionic-Liquid-Based Materials to Remove Insecticides
Source: MDPI journal article supplement (doi:10.3390/ijms23062989), 2022-03-10
Supplement: s1 [file s1]

## Supplementary Material

# High Performance of Ionic-Liquid-Based Materials in Removing Neonicotinoid Insecticides

Rafael Francisco <sup>1</sup>, Catarina Almeida<sup>1</sup>, Ana C. A. Sousa<sup>2</sup>, Márcia C. Neves<sup>1</sup> and Mara G. Freire<sup>1\*</sup>

<sup>1</sup> CICECO-Aveiro Institute of Materials, Department of Chemistry, University of Aveiro, 3810-193 Aveiro, Portugal; rafaelfrancisco@ua.pt; ac.almeida@ua.pt; mcneves@ua.pt; maragfreire@ua.pt

<sup>2</sup> Department of Biology and Comprehensive Health Research Centre (CHRC), University of Évora, 7004-554 Évora, Portugal; acsousa@uevora.pt

\* Correspondence: maragfreire@ua.pt

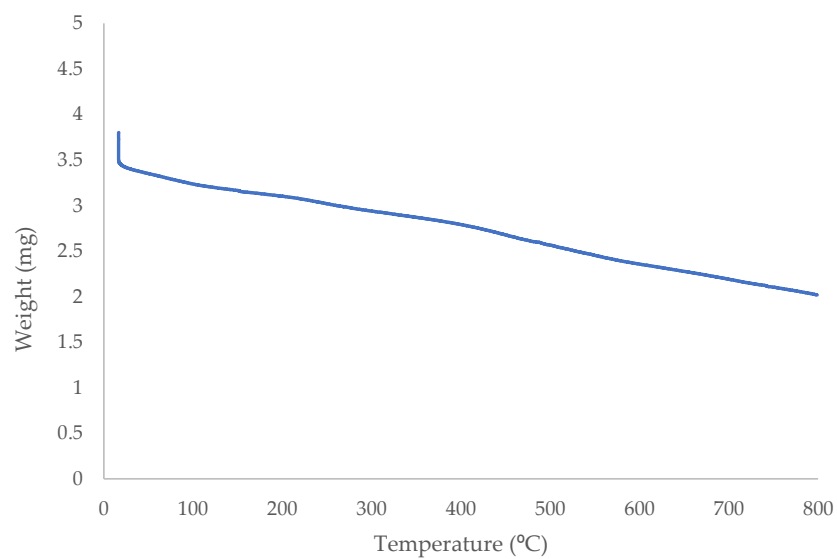

**Figure S1.** Degradation temperatures of a [Si][N<sub>322</sub>]Cl sample by Thermogravimetric analysis (TGA).

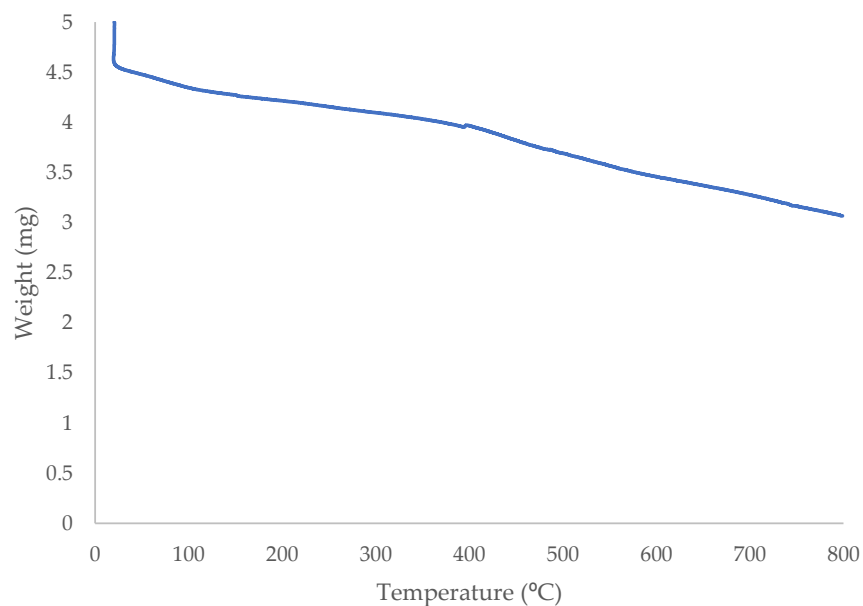

**Figure S2.** Degradation temperatures of a [Si][N<sub>344</sub>]Cl sample by Thermogravimetric analysis (TGA).

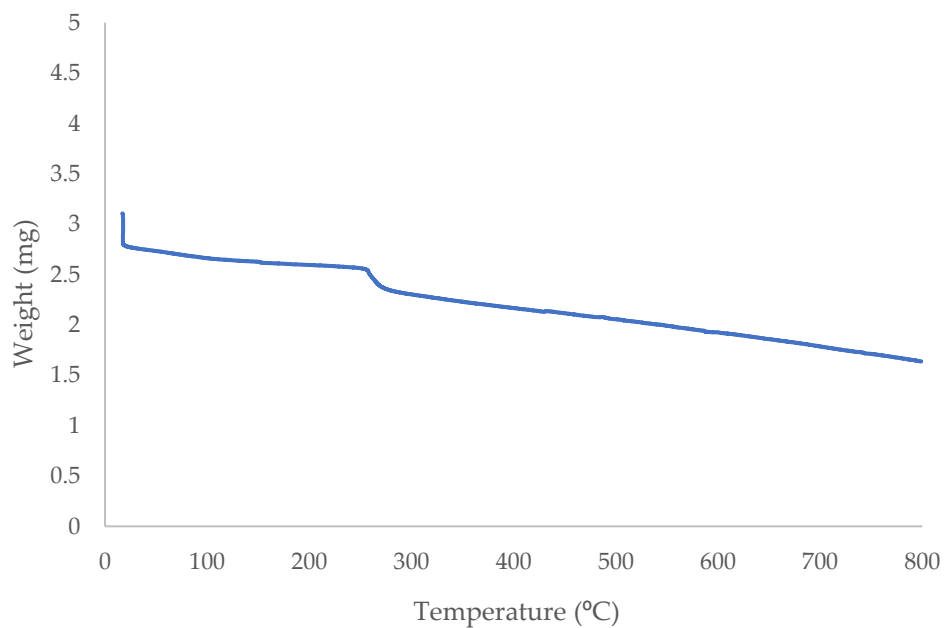

**Figure S3.** Degradation temperatures of a  $[\text{Si}][\text{N}_{3888}]\text{Cl}$  sample by Thermogravimetric analysis (TGA).

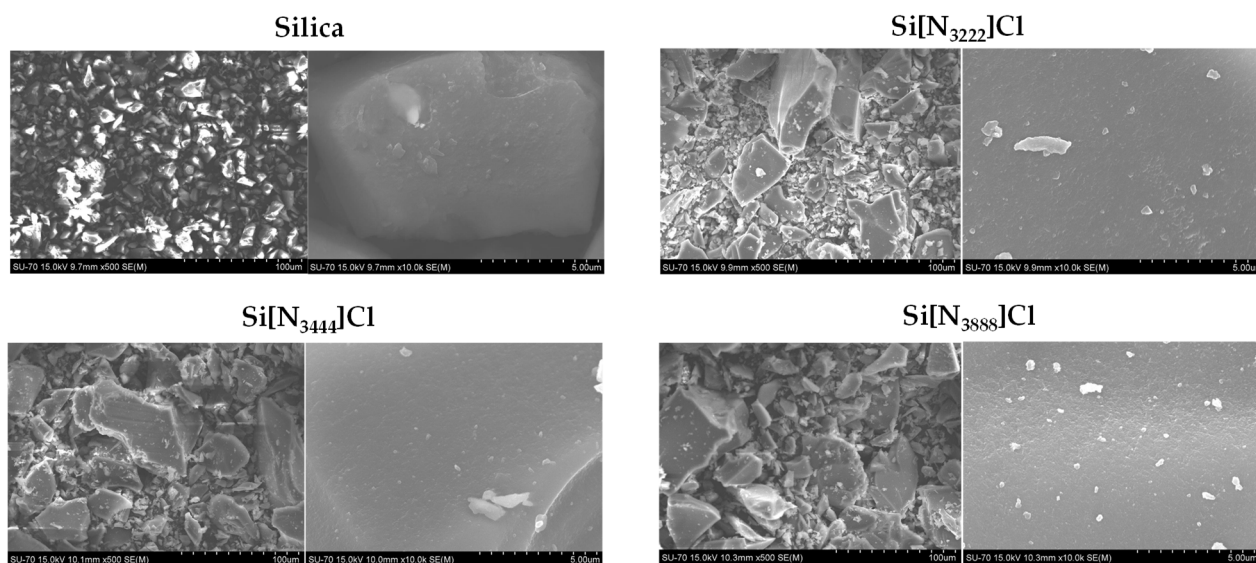

**Figure S4.** SEM images of silica and synthesized SILs (two different magnifications).

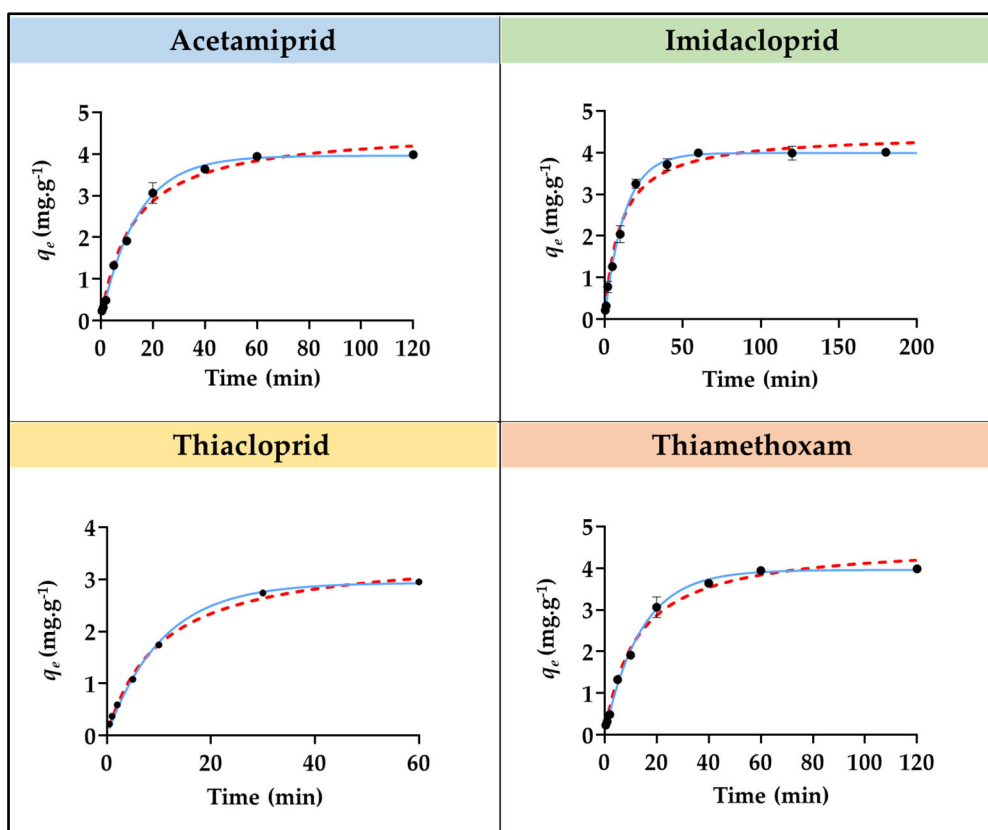

**Figure S5.** Adsorption kinetics curves for acetamiprid, imidacloprid, thiacloprid, and thiamethoxam insecticides with AC. The black dots correspond to the experimental data, the blue continuous line correspond to the adjustment of the experimental data with the Pseudo first-order model and the red dashed line corresponds to the adjustment of the experimental data with the Pseudo second-order model.

**Table S1.** Concentration of acetamiprid in the solid phase ( $q_e$ ) for each contact time, with Si[N<sub>3222</sub>]Cl, [Si][N<sub>3444</sub>]Cl, [Si][N<sub>3888</sub>]Cl, and the respective standard deviation ( $\sigma$ ).

| t (min) | Si[N <sub>3222</sub> ]Cl    |                       | Si[N <sub>3444</sub> ]Cl    |                       | Si[N <sub>3888</sub> ]Cl    |                        |
|---------|-----------------------------|-----------------------|-----------------------------|-----------------------|-----------------------------|------------------------|
|         | $q_e$ (mg g <sup>-1</sup> ) | $\sigma$              | $q_e$ (mg g <sup>-1</sup> ) | $\sigma$              | $q_e$ (mg g <sup>-1</sup> ) | $\sigma$               |
| 0.5     | 0.962                       | $9.00 \times 10^{-9}$ | 1.414                       | $6.38 \times 10^{-2}$ | 0.842                       | $1.686 \times 10^{-2}$ |
| 1       | 1.043                       | $4.65 \times 10^{-3}$ | ---                         | ---                   | 1.245                       | $6.719 \times 10^{-2}$ |
| 2       | 1.061                       | $1.94 \times 10^{-7}$ | 1.686                       | $6.09 \times 10^{-3}$ | 1.854                       | $4.556 \times 10^{-2}$ |
| 5       | 1.085                       | $6.55 \times 10^{-3}$ | 1.723                       | $1.78 \times 10^{-4}$ | 1.970                       | $2.425 \times 10^{-2}$ |
| 10      | 1.067                       | $3.22 \times 10^{-3}$ | 1.739                       | $1.50 \times 10^{-2}$ | 1.954                       | $5.676 \times 10^{-3}$ |
| 20      | 1.007                       | $2.50 \times 10^{-3}$ | 1.792                       | $1.58 \times 10^{-2}$ | 1.911                       | $1.381 \times 10^{-2}$ |
| 40      | 1.025                       | $9.34 \times 10^{-3}$ | 1.753                       | $4.50 \times 10^{-2}$ | 1.975                       | $1.674 \times 10^{-2}$ |
| 60      | 1.042                       | $9.72 \times 10^{-4}$ | 1.773                       | $7.74 \times 10^{-3}$ | 1.950                       | $4.310 \times 10^{-2}$ |

**Table S2.** Concentration of imidacloprid in the solid phase ( $q_e$ ) for each contact time, with Si[N<sub>3222</sub>]Cl, [Si][N<sub>3444</sub>]Cl, [Si][N<sub>3888</sub>]Cl, and the respective standard deviation ( $\sigma$ ).

| t (min) | Si[N <sub>3222</sub> ]Cl    |                        | Si[N <sub>3444</sub> ]Cl    |                        | Si[N <sub>3888</sub> ]Cl    |                        |
|---------|-----------------------------|------------------------|-----------------------------|------------------------|-----------------------------|------------------------|
|         | $q_e$ (mg g <sup>-1</sup> ) | $\sigma$               | $q_e$ (mg g <sup>-1</sup> ) | $\sigma$               | $q_e$ (mg g <sup>-1</sup> ) | $\sigma$               |
| 0.5     | 0.808                       | $2.621 \times 10^{-2}$ | 0.767                       | $4.459 \times 10^{-2}$ | 1.970                       | $6.270 \times 10^{-4}$ |
| 1       | 0.891                       | $5.918 \times 10^{-2}$ | 0.834                       | $4.804 \times 10^{-2}$ | 2.173                       | $2.833 \times 10^{-2}$ |
| 2       | 0.902                       | $4.632 \times 10^{-2}$ | 0.884                       | $4.908 \times 10^{-2}$ | 2.310                       | $1.131 \times 10^{-1}$ |
| 5       | 0.902                       | $5.557 \times 10^{-2}$ | 1.127                       | $4.427 \times 10^{-2}$ | 2.434                       | $3.608 \times 10^{-2}$ |
| 10      | 0.884                       | $1.517 \times 10^{-2}$ | 1.237                       | $2.444 \times 10^{-2}$ | 2.479                       | $3.849 \times 10^{-2}$ |
| 20      | 0.866                       | $2.638 \times 10^{-2}$ | 1.270                       | $1.290 \times 10^{-2}$ | 2.510                       | $1.722 \times 10^{-3}$ |
| 40      | 0.833                       | $2.526 \times 10^{-2}$ | 1.340                       | $5.593 \times 10^{-2}$ | 2.424                       | $2.618 \times 10^{-2}$ |
| 60      | 0.849                       | $1.538 \times 10^{-2}$ | 1.398                       | $3.339 \times 10^{-3}$ | 2.557                       | $2.173 \times 10^{-2}$ |

**Table S3.** Concentration of thiadocloprid in the solid phase ( $q_e$ ) for each contact time, with Si[N<sub>3222</sub>]Cl, [Si][N<sub>3444</sub>]Cl, [Si][N<sub>3888</sub>]Cl, and the respective standard deviation ( $\sigma$ ).

| t (min) | Si[N <sub>3222</sub> ]Cl    |                        | Si[N <sub>3444</sub> ]Cl    |                        | Si[N <sub>3888</sub> ]Cl    |                        |
|---------|-----------------------------|------------------------|-----------------------------|------------------------|-----------------------------|------------------------|
|         | $q_e$ (mg g <sup>-1</sup> ) | $\sigma$               | $q_e$ (mg g <sup>-1</sup> ) | $\sigma$               | $q_e$ (mg g <sup>-1</sup> ) | $\sigma$               |
| 0.5     | 0.787                       | $8.884 \times 10^{-2}$ | 0.532                       | $1.501 \times 10^{-1}$ | 1.131                       | $2.919 \times 10^{-1}$ |
| 1       | 1.362                       | $7.250 \times 10^{-3}$ | 0.949                       | $1.122 \times 10^{-1}$ | 1.856                       | $5.769 \times 10^{-2}$ |
| 2       | 1.490                       | $5.910 \times 10^{-3}$ | 1.148                       | $3.674 \times 10^{-2}$ | 1.983                       | $9.613 \times 10^{-2}$ |
| 5       | 1.613                       | $5.153 \times 10^{-2}$ | 1.726                       | $6.964 \times 10^{-2}$ | 2.241                       | $6.359 \times 10^{-2}$ |
| 10      | 1.640                       | $3.166 \times 10^{-2}$ | 1.067                       | $5.527 \times 10^{-2}$ | 1.067                       | $5.155 \times 10^{-2}$ |
| 30      | 1.663                       | $1.126 \times 10^{-2}$ | 2.137                       | $3.170 \times 10^{-2}$ | 2.232                       | $2.475 \times 10^{-2}$ |
| 60      | 1.698                       | $6.355 \times 10^{-3}$ | 2.192                       | $4.507 \times 10^{-2}$ | 2.242                       | $6.839 \times 10^{-2}$ |

**Table S4.** Concentration of thiamethoxam in the solid phase ( $q_e$ ) for each contact time, with Si[N<sub>3222</sub>]Cl, [Si][N<sub>3444</sub>]Cl, [Si][N<sub>3888</sub>]Cl, and the respective standard deviation ( $\sigma$ ).

| t (min) | Si[N <sub>3222</sub> ]Cl    |                        | Si[N <sub>3444</sub> ]Cl    |                        | Si[N <sub>3888</sub> ]Cl    |                        |
|---------|-----------------------------|------------------------|-----------------------------|------------------------|-----------------------------|------------------------|
|         | $q_e$ (mg g <sup>-1</sup> ) | $\sigma$               | $q_e$ (mg g <sup>-1</sup> ) | $\sigma$               | $q_e$ (mg g <sup>-1</sup> ) | $\sigma$               |
| 0.5     | 0.812                       | $2.364 \times 10^{-2}$ | 0.263                       | $7.797 \times 10^{-2}$ | 1.091                       | $1.142 \times 10^{-1}$ |
| 1       | 0.909                       | $2.141 \times 10^{-2}$ | 0.339                       | $3.810 \times 10^{-2}$ | 1.427                       | $1.287 \times 10^{-1}$ |
| 2       | 0.947                       | $1.305 \times 10^{-2}$ | 0.514                       | $2.188 \times 10^{-2}$ | 1.844                       | $1.619 \times 10^{-2}$ |
| 5       | 0.908                       | $9.633 \times 10^{-3}$ | 0.572                       | $5.763 \times 10^{-2}$ | 1.979                       | $3.026 \times 10^{-2}$ |
| 10      | 1.067                       | $2.062 \times 10^{-2}$ | 1.067                       | $5.625 \times 10^{-2}$ | 1.067                       | $7.247 \times 10^{-2}$ |
| 20      | 0.860                       | $2.343 \times 10^{-2}$ | 0.672                       | $2.685 \times 10^{-2}$ | 1.946                       | $4.867 \times 10^{-2}$ |
| 40      | 0.814                       | $1.976 \times 10^{-3}$ | 0.649                       | $2.644 \times 10^{-2}$ | 1.930                       | $9.226 \times 10^{-2}$ |
| 60      | 0.814                       | $1.625 \times 10^{-7}$ | 0.697                       | $2.570 \times 10^{-2}$ | 1.982                       | $3.511 \times 10^{-2}$ |

**Table S5.** Concentration of acetamiprid, imidacloprid, thiacloprid, and thiamethoxam in the solid phase ( $q_e$ ) for each contact time, with AC, and the respective standard deviation ( $\sigma$ ).

| t (min) | Acetamiprid                    |                       | Imidacloprid                   |                       | Thiacloprid                    |                       | Thiamethoxam                   |                       |
|---------|--------------------------------|-----------------------|--------------------------------|-----------------------|--------------------------------|-----------------------|--------------------------------|-----------------------|
|         | $q_e$<br>(mg g <sup>-1</sup> ) | $\sigma$              |
| 0.5     | 0.235                          | $1.76 \times 10^{-2}$ | 0.220                          | $5.28 \times 10^{-2}$ | 0.222                          | $6.43 \times 10^{-3}$ | 0.235                          | $1.76 \times 10^{-2}$ |
| 1       | 0.322                          | $3.64 \times 10^{-3}$ | 0.324                          | $7.27 \times 10^{-2}$ | 0.373                          | $1.27 \times 10^{-3}$ | 0.322                          | $3.64 \times 10^{-3}$ |
| 2       | 0.491                          | $3.47 \times 10^{-2}$ | 0.782                          | $1.15 \times 10^{-1}$ | 0.592                          | $2.60 \times 10^{-3}$ | 0.491                          | $3.47 \times 10^{-2}$ |
| 5       | 1.33                           | $6.96 \times 10^{-2}$ | 1.27                           | $5.47 \times 10^{-2}$ | 1.08                           | $2.57 \times 10^{-3}$ | 1.33                           | $6.96 \times 10^{-2}$ |
| 10      | 1.07                           | $3.00 \times 10^{-3}$ | 1.07                           | $1.74 \times 10^{-1}$ | 1.07                           | 0.00                  | 1.07                           | $3.00 \times 10^{-3}$ |
| 20      | 3.06                           | $2.15 \times 10^{-1}$ | 3.25                           | $9.29 \times 10^{-2}$ | 2.74                           | 0.00                  | 3.06                           | $2.15 \times 10^{-1}$ |
| 40      | 3.64                           | $1.42 \times 10^{-2}$ | 3.72                           | $1.19 \times 10^{-1}$ | 2.95                           | $1.27 \times 10^{-3}$ | 3.64                           | $1.42 \times 10^{-2}$ |
| 60      | 3.94                           | $3.42 \times 10^{-2}$ | 4.00                           | $6.96 \times 10^{-2}$ | ---                            | ---                   | 3.94                           | $3.42 \times 10^{-2}$ |
| 120     | 3.99                           | $4.50 \times 10^{-2}$ | 3.99                           | $1.44 \times 10^{-1}$ | ---                            | ---                   | 3.99                           | $4.50 \times 10^{-2}$ |
| 180     | ---                            | ---                   | 4.01                           | $5.62 \times 10^{-2}$ | ---                            | ---                   | ---                            | ---                   |

**Table S6.** Adsorption efficiencies at equilibrium and at 10 minutes of contact of imidacloprid, acetamiprid, thiacloprid and thiamethoxam with [Si][N<sub>3222</sub>]Cl, [Si][N<sub>3444</sub>]Cl, [Si][N<sub>3888</sub>]Cl and AC.

| Pesticide    | Material                   | Adsorption efficiency (%) |               |
|--------------|----------------------------|---------------------------|---------------|
|              |                            | At equilibrium            | After 10 min. |
| Imidacloprid | [Si][N <sub>3222</sub> ]Cl | 22.4                      | 22.4          |
|              | [Si][N <sub>3444</sub> ]Cl | 35.4                      | 35.4          |
|              | [Si][N <sub>3888</sub> ]Cl | 62.3                      | 62.3          |
|              | AC                         | 100.0                     | 50.0          |
| Acetamiprid  | [Si][N <sub>3222</sub> ]Cl | 28.5                      | 28.5          |
|              | [Si][N <sub>3444</sub> ]Cl | 47.5                      | 47.5          |
|              | [Si][N <sub>3888</sub> ]Cl | 50.4                      | 50.4          |
|              | AC                         | 98.9                      | 48.8          |
| Thiacloprid  | [Si][N <sub>3222</sub> ]Cl | 57.5                      | 57.5          |
|              | [Si][N <sub>3444</sub> ]Cl | 72.6                      | 64.7          |
|              | [Si][N <sub>3888</sub> ]Cl | 77.0                      | 77.0          |
|              | AC                         | 99.5                      | 58.9          |
| Thiamethoxam | [Si][N <sub>3222</sub> ]Cl | 22.6                      | 22.6          |
|              | [Si][N <sub>3444</sub> ]Cl | 18.2                      | 18.2          |
|              | [Si][N <sub>3888</sub> ]Cl | 47.3                      | 47.3          |
|              | AC                         | 100.0                     | 52.7          |

**Table S7.** Maximum equilibrium concentration ( $q_e$ ) and aadsorption efficiencies (AE%) of [Si][C<sub>3</sub>C<sub>1</sub>im]Cl, [Si][N<sub>3114</sub>]Cl [Si][N<sub>3222</sub>]Cl, [Si][N<sub>3444</sub>]Cl, [Si][N<sub>3888</sub>]Cl for imidacloprid, obtained in the initial screening adsorption studies

| Material                                 | $q_e$ (mg L <sup>-1</sup> ) | AE (%) |
|------------------------------------------|-----------------------------|--------|
| [Si][C <sub>3</sub> C <sub>1</sub> im]Cl | 0                           | 0      |
| [Si][N <sub>3114</sub> ]Cl               | 0.03                        | 1.52   |
| [Si][N <sub>3222</sub> ]Cl               | 0.45                        | 23.9   |
| [Si][N <sub>3444</sub> ]Cl               | 0.94                        | 50.2   |
| [Si][N <sub>3888</sub> ]Cl               | 1.08                        | 57.4   |

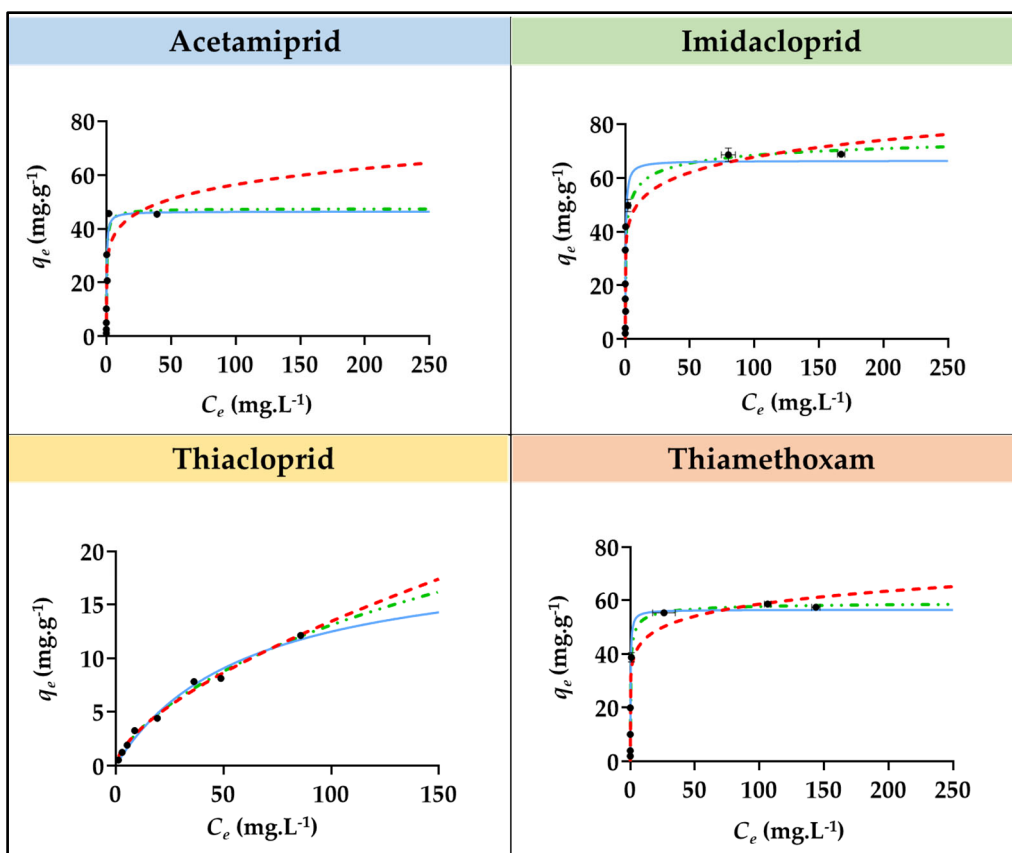

**Figure S6.** Adsorption isotherms curves for imidacloprid, acetamiprid, thiacloprid, and thiamethoxam insecticides with AC. The black dots correspond to experimental data, the continuous line correspond to an adjustment of the experimental data with the Langmuir model, the dashed line correspond to an adjustment of the experimental data with Freundlich model, and the dashed and pointed line correspond to adjustment of the experimental data with SIPS model.

**Table S8.** Equilibrium concentration of acetamiprid after adsorption ( $C_e$ ), concentration of adsorbate in the solid phase ( $q_e$ ), with respective standard deviations ( $\sigma$ ), for [Si][C<sub>3222</sub>]Cl and [Si][N<sub>3444</sub>]Cl.

| $C_e$<br>(mg L <sup>-1</sup> ) | Si[N <sub>32222</sub> ]Cl      |                        | $C_e$<br>(mg L <sup>-1</sup> ) | Si[N <sub>3444</sub> ]Cl       |                        |
|--------------------------------|--------------------------------|------------------------|--------------------------------|--------------------------------|------------------------|
|                                | $q_e$<br>(mg g <sup>-1</sup> ) | $\sigma$               |                                | $q_e$<br>(mg g <sup>-1</sup> ) | $\sigma$               |
| 208.8                          | 13.383                         | $3.617 \times 10^{-1}$ | 189.6                          | 16.770                         | $5.810 \times 10^{-1}$ |
| 162.5                          | 12.295                         | $3.074 \times 10^{-1}$ | 146.8                          | 15.262                         | $6.074 \times 10^{-1}$ |
| 116.7                          | 8.678                          | $0.000 \times 10^0$    | 105.2                          | 10.945                         | $3.351 \times 10^{-1}$ |
| 78.4                           | 5.735                          | $1.191 \times 10^{-1}$ | 68.8                           | 7.384                          | $1.898 \times 10^{-1}$ |
| 38.4                           | 2.830                          | $0.000 \times 10^0$    | 34.1                           | 3.656                          | $2.450 \times 10^{-1}$ |
| 18.4                           | 1.493                          | $9.417 \times 10^{-3}$ | 15.8                           | 2.088                          | $4.901 \times 10^{-3}$ |
| 9                              | 0.814                          | $0.000 \times 10^0$    | 7.7                            | 1.033                          | $1.861 \times 10^{-3}$ |
| 4                              | 0.313                          | $9.761 \times 10^{-4}$ | 3.3                            | 0.465                          | $1.937 \times 10^{-3}$ |

**Table S9.** Equilibrium concentration of acetamiprid after adsorption ( $C_e$ ), concentration of adsorbate in the solid phase ( $q_e$ ), with respective standard deviations ( $\sigma$ ), for [Si][N<sub>3888</sub>]Cl and AC.

| $C_e$<br>(mg L <sup>-1</sup> ) | Si[N <sub>3888</sub> ]Cl       |                        | $C_e$<br>(mg L <sup>-1</sup> ) | AC                             |                        |
|--------------------------------|--------------------------------|------------------------|--------------------------------|--------------------------------|------------------------|
|                                | $q_e$<br>(mg g <sup>-1</sup> ) | $\sigma$               |                                | $q_e$<br>(mg g <sup>-1</sup> ) | $\sigma$               |
| 161                            | 21.998                         | $3.767 \times 10^{-1}$ | 39.2                           | 45.453                         | $2.803 \times 10^{-2}$ |
| 131                            | 18.974                         | $4.724 \times 10^{-1}$ | 2.000                          | 45.680                         | $1.008 \times 10^{-1}$ |
| 95.4                           | 13.637                         | $5.929 \times 10^{-2}$ | 0.300                          | 30.333                         | $9.027 \times 10^{-5}$ |
| 61.1                           | 9.082                          | $2.711 \times 10^{-1}$ | 0.700                          | 20.681                         | $0.000 \times 10^0$    |
| 27.6                           | 4.928                          | $4.841 \times 10^{-2}$ | 0.100                          | 10.264                         | $0.000 \times 10^0$    |
| 13.1                           | 2.528                          | $9.380 \times 10^{-2}$ | 0.00                           | 5.010                          | $0.000 \times 10^0$    |
| 7.60                           | 1.118                          | $0.000 \times 10^0$    | 0.00                           | 2.584                          | $0.000 \times 10^0$    |
| 2.80                           | 0.559                          | $0.000 \times 10^0$    | 0.00                           | 1.144                          | $0.000 \times 10^0$    |



**Table S10.** Equilibrium concentration of imidacloprid after adsorption ( $C_e$ ), concentration of adsorbate in the solid phase ( $q_e$ ), with respective standard deviations ( $\sigma$ ), for [Si][C<sub>3222</sub>]Cl, and [Si][N<sub>3444</sub>]Cl.

| $C_e$<br>(mg L <sup>-1</sup> ) | Si[N <sub>3222</sub> ]Cl       |                        | $C_e$<br>(mg L <sup>-1</sup> ) | Si[N <sub>3444</sub> ]Cl       |                        |
|--------------------------------|--------------------------------|------------------------|--------------------------------|--------------------------------|------------------------|
|                                | $q_e$<br>(mg g <sup>-1</sup> ) | $\sigma$               |                                | $q_e$<br>(mg g <sup>-1</sup> ) | $\sigma$               |
| 195                            | 13.069                         | $1.455 \times 10^0$    | 190                            | 13.743                         | $1.991 \times 10^0$    |
| 154                            | 9.838                          | $1.265 \times 10^0$    | 154                            | 10.317                         | $1.132 \times 10^0$    |
| 113                            | 6.346                          | $1.793 \times 10^{-1}$ | 115                            | 9.297                          | $1.420 \times 10^0$    |
| 74.8                           | 5.230                          | $9.467 \times 10^{-1}$ | 74.4                           | 5.168                          | $3.898 \times 10^{-1}$ |
| 56.9                           | 4.022                          | $7.637 \times 10^{-1}$ | 58.0                           | 3.851                          | $4.546 \times 10^{-1}$ |
| 38.1                           | 2.735                          | $7.084 \times 10^{-1}$ | 37.7                           | 2.864                          | $1.874 \times 10^{-1}$ |
| 14.4                           | 1.208                          | $2.456 \times 10^{-1}$ | 14.8                           | 1.136                          | $1.575 \times 10^{-1}$ |
| 8.70                           | 0.452                          | $8.722 \times 10^{-2}$ | 9.30                           | 0.338                          | $3.707 \times 10^{-1}$ |
| 388                            | 23.167                         | $1.456 \times 10^0$    | 418                            | 37.243                         | $1.149 \times 10^{-1}$ |
| 468                            | 27.353                         | $2.348 \times 10^{-1}$ | 306                            | 25.944                         | $1.565 \times 10^{-1}$ |
| 314                            | 22.588                         | $1.679 \times 10^0$    | ---                            | ---                            | ---                    |

**Table S11.** Equilibrium concentration of imidacloprid after adsorption ( $C_e$ ), concentration of adsorbate in the solid phase ( $q_e$ ), with respective standard deviations ( $\sigma$ ), for [Si][N<sub>3888</sub>]Cl and AC.

| $C_e$<br>(mg L <sup>-1</sup> ) | Si[N <sub>3888</sub> ]Cl       |                        | $C_e$<br>(mg L <sup>-1</sup> ) | AC                             |                        |
|--------------------------------|--------------------------------|------------------------|--------------------------------|--------------------------------|------------------------|
|                                | $q_e$<br>(mg g <sup>-1</sup> ) | $\sigma$               |                                | $q_e$<br>(mg g <sup>-1</sup> ) | $\sigma$               |
| 134                            | 25.642                         | $8.172 \times 10^{-1}$ | 2.20                           | 49.746                         | $1.982 \times 10^0$    |
| 100                            | 20.321                         | $1.641 \times 10^{-1}$ | 0.400                          | 41.858                         | $8.364 \times 10^{-1}$ |
| 68.8                           | 15.571                         | $1.194 \times 10^{-1}$ | 0.100                          | 33.138                         | $6.886 \times 10^{-1}$ |
| 42.7                           | 11.418                         | $7.373 \times 10^{-1}$ | 0.00                           | 20.546                         | $1.910 \times 10^{-1}$ |
| 32.6                           | 9.019                          | $3.340 \times 10^{-1}$ | 0.00                           | 14.979                         | $4.452 \times 10^{-1}$ |
| 20.2                           | 6.039                          | $2.689 \times 10^{-1}$ | 0.300                          | 10.368                         | $1.627 \times 10^{-1}$ |
| 7.40                           | 2.626                          | $2.254 \times 10^{-1}$ | 0.00                           | 4.127                          | $1.004 \times 10^{-1}$ |
| 3.40                           | 1.512                          | $1.103 \times 10^{-1}$ | 0.00                           | 2.194                          | $6.606 \times 10^{-2}$ |
| 303                            | 42.683                         | $1.219 \times 10^0$    | 167                            | 68.829                         | $5.840 \times 10^{-1}$ |
| 357                            | 48.671                         | $4.910 \times 10^{-1}$ | 79.9                           | 68.646                         | $2.152 \times 10^0$    |
| 247                            | 36.304                         | $3.605 \times 10^1$    | ---                            | ---                            | ---                    |

**Table S12.** Equilibrium concentration of thiachloprid after adsorption ( $C_e$ ), concentration of adsorbate in the solid phase ( $q_e$ ), with respective standard deviations ( $\sigma$ ), for [Si][N<sub>3222</sub>]Cl and [Si][N<sub>3444</sub>]Cl.

| $C_e$<br>(mg L <sup>-1</sup> ) | Si[N <sub>3222</sub> ]Cl       |                        | $C_e$<br>(mg L <sup>-1</sup> ) | Si[N <sub>3444</sub> ]Cl       |                        |
|--------------------------------|--------------------------------|------------------------|--------------------------------|--------------------------------|------------------------|
|                                | $q_e$<br>(mg g <sup>-1</sup> ) | $\sigma$               |                                | $q_e$<br>(mg g <sup>-1</sup> ) | $\sigma$               |
| 101.0                          | 15.866                         | $4.809 \times 10^{-1}$ | 84.0                           | 21.065                         | $3.493 \times 10^{-1}$ |
| 64.6                           | 10.399                         | $8.495 \times 10^{-2}$ | 54.8                           | 13.269                         | $3.336 \times 10^{-1}$ |
| 49.0                           | 8.702                          | $1.627 \times 10^{-1}$ | 42.6                           | 11.086                         | $2.215 \times 10^{-1}$ |
| 28.1                           | 5.888                          | $2.127 \times 10^{-1}$ | 25.9                           | 6.588                          | $1.306 \times 10^{-1}$ |
| 15.4                           | 3.123                          | $2.069 \times 10^{-1}$ | 12.7                           | 4.151                          | $1.678 \times 10^{-1}$ |
| 9.50                           | 2.344                          | $2.356 \times 10^{-1}$ | 8.10                           | 2.693                          | $9.503 \times 10^{-2}$ |
| 6.40                           | 1.092                          | $6.426 \times 10^{-2}$ | 5.10                           | 1.622                          | $4.120 \times 10^{-2}$ |
| 3.10                           | 0.550                          | $8.286 \times 10^{-3}$ | 2.10                           | 0.908                          | $2.451 \times 10^{-2}$ |

**Table S13.** Equilibrium concentration of thiachloprid after adsorption ( $C_e$ ), concentration of adsorbate in the solid phase ( $q_e$ ), with respective standard deviations ( $\sigma$ ), for [Si][N<sub>3888</sub>]Cl and AC.

| $C_e$<br>(mg L <sup>-1</sup> ) | Si[N <sub>3888</sub> ]Cl       |                        | $C_e$<br>(mg L <sup>-1</sup> ) | AC                             |                     |
|--------------------------------|--------------------------------|------------------------|--------------------------------|--------------------------------|---------------------|
|                                | $q_e$<br>(mg g <sup>-1</sup> ) | $\sigma$               |                                | $q_e$<br>(mg g <sup>-1</sup> ) | $\sigma$            |
| 80.7                           | 23.178                         | $5.367 \times 10^{-1}$ | 85.9                           | 12.110                         | $0.000 \times 10^0$ |
| 53.1                           | 14.006                         | $5.880 \times 10^{-1}$ | 48.9                           | 8.130                          | $0.000 \times 10^0$ |
| 41.1                           | 12.036                         | $4.271 \times 10^{-1}$ | 36.4                           | 7.830                          | $0.000 \times 10^0$ |
| 24.4                           | 7.001                          | $2.227 \times 10^{-1}$ | 19.4                           | 4.420                          | $0.000 \times 10^0$ |
| 12.3                           | 4.190                          | $1.804 \times 10^{-1}$ | 8.90                           | 3.270                          | $0.000 \times 10^0$ |
| 8.50                           | 2.643                          | $2.004 \times 10^{-2}$ | 5.40                           | 1.920                          | $0.000 \times 10^0$ |
| 4.70                           | 1.748                          | $4.500 \times 10^{-2}$ | 3.00                           | 1.250                          | $0.000 \times 10^0$ |
| 2.10                           | 0.938                          | $2.684 \times 10^{-2}$ | 1.30                           | 0.540                          | $0.000 \times 10^0$ |

**Table S14.** Equilibrium concentration of thiamethoxam after adsorption ( $C_e$ ), concentration of adsorbate in the solid phase ( $q_e$ ), with respective standard deviations ( $\sigma$ ), for [Si][N<sub>3222</sub>]Cl and [Si][N<sub>3444</sub>]Cl.

| $C_e$<br>(mg L <sup>-1</sup> ) | Si[N <sub>3222</sub> ]Cl       |                        | $C_e$<br>(mg L <sup>-1</sup> ) | Si[N <sub>3444</sub> ]Cl       |                        |
|--------------------------------|--------------------------------|------------------------|--------------------------------|--------------------------------|------------------------|
|                                | $q_e$<br>(mg g <sup>-1</sup> ) | $\sigma$               |                                | $q_e$<br>(mg g <sup>-1</sup> ) | $\sigma$               |
| 433                            | 14.781                         | $0.000 \times 10^0$    | 176                            | 4.846                          | $1.601 \times 10^0$    |
| 343                            | 11.248                         | $5.544 \times 10^{-1}$ | 87.7                           | 2.688                          | $1.485 \times 10^{-1}$ |
| 250                            | 10.642                         | $1.060 \times 10^0$    | 44.3                           | 1.315                          | $2.004 \times 10^{-1}$ |
| 164                            | 7.281                          | $2.478 \times 10^{-1}$ | 17.7                           | 0.699                          | $7.125 \times 10^{-2}$ |
| 81.2                           | 4.130                          | $1.694 \times 10^{-1}$ | 644                            | 33.762                         | $5.914 \times 10^{-1}$ |
| 40.2                           | 2.143                          | $8.187 \times 10^{-3}$ | 479                            | 27.774                         | $1.342 \times 10^0$    |
| 16.2                           | 0.990                          | $1.634 \times 10^{-2}$ | 324                            | 16.711                         | $1.076 \times 10^0$    |
| 8.10                           | 0.464                          | $3.158 \times 10^{-2}$ | ---                            | ---                            | ---                    |
| 713                            | 21.028                         | $3.894 \times 10^{-1}$ | ---                            | ---                            | ---                    |
| 538                            | 16.624                         | $1.020 \times 10^{-1}$ | ---                            | ---                            | ---                    |

**Table S15.** Equilibrium concentration of thiamethoxam after adsorption ( $C_e$ ), concentration of adsorbate in the solid phase ( $q_e$ ), with respective standard deviations ( $\sigma$ ), for [Si][N<sub>3888</sub>]Cl and AC.

| $C_e$<br>(mg L <sup>-1</sup> ) | Si[N <sub>3888</sub> ]Cl       |                        | $C_e$<br>(mg L <sup>-1</sup> ) | AC                             |                        |
|--------------------------------|--------------------------------|------------------------|--------------------------------|--------------------------------|------------------------|
|                                | $q_e$<br>(mg g <sup>-1</sup> ) | $\sigma$               |                                | $q_e$<br>(mg g <sup>-1</sup> ) | $\sigma$               |
| 375                            | 25.831                         | $2.231 \times 10^0$    | 144                            | 57.279                         | $9.922 \times 10^{-1}$ |
| 288                            | 25.480                         | $6.821 \times 10^{-1}$ | 107                            | 58.489                         | $3.415 \times 10^{-1}$ |
| 210                            | 20.281                         | $2.110 \times 10^0$    | 26.2                           | 55.221                         | $1.007 \times 10^{-1}$ |
| 135                            | 12.633                         | $1.212 \times 10^0$    | 0.900                          | 38.695                         | $1.526 \times 10^0$    |
| 59.0                           | 7.896                          | $1.444 \times 10^{-1}$ | 0.100                          | 19.955                         | $5.485 \times 10^{-1}$ |
| 27.4                           | 4.561                          | $3.580 \times 10^{-2}$ | 0.00                           | 10.119                         | $2.213 \times 10^{-1}$ |
| 10.0                           | 1.936                          | $2.311 \times 10^{-2}$ | 0.00                           | 4.036                          | $8.137 \times 10^{-2}$ |
| 5.40                           | 0.954                          | $5.558 \times 10^{-2}$ | 0.00                           | 2.063                          | $3.341 \times 10^{-2}$ |
| 607                            | 40.044                         | $1.104 \times 10^0$    | ---                            | ---                            | ---                    |
| 468                            | 32.462                         | $3.358 \times 10^{-1}$ | ---                            | ---                            | ---                    |

**Table S16.** Maximum adsorption capacity for acetamiprid, imidacloprid, thiacloprid, and thiamethoxam with [Si][N<sub>388</sub>]Cl, obtained by columns saturation assays, and their respective standard deviations ( $\sigma$ ).

| <b>Insecticide</b> | <b><math>q_e</math> (mg g<sup>-1</sup>)</b> | <b><math>\sigma</math></b> |
|--------------------|---------------------------------------------|----------------------------|
| Imidacloprid       | 50.653                                      | 1.303                      |
| Acetamiprid        | 34.289                                      | 1.145                      |
| Thiacloprid        | 49.266                                      | 1.206                      |
| Thiamethoxam       | 45.744                                      | 0.351                      |
